# Supplementary material for: Pressure-dependent structure and electronic properties of energetic NTO crystals dominated by hydrogen-bonding interactions
Source: Royal Society of Chemistry journal article supplement (doi:10.1039/d3cp01518a), 2023-01-01
Supplement: d3cp01518a1.pdf [file d3cp01518a1.pdf]

## Supporting Information

### **Pressure-dependent structure and electronic properties of energetic NTO crystal dominated by hydrogen-bonding interactions**

Junyu Fan,<sup>1,2</sup> Pengju Wang<sup>3,4</sup> and Nan Gao<sup>5,\*</sup>

<sup>1</sup>*Department of Physics, Taiyuan Normal University, Jinzhong, 030619, China*

<sup>2</sup>*Institute of Computational and Applied Physics, Taiyuan Normal University, Jinzhong, 030619,  
China*

<sup>3</sup>*Zhejiang Laboratory, Hangzhou 311100, China*

<sup>4</sup>*Key Laboratory of Materials Modification by Laser, Ion and Electron Beams (Dalian University  
of Technology), Ministry of Education, Dalian, 116024, China*

<sup>5</sup>*School of Materials Science and Engineering, Taizhou University, Taizhou 318000, China*

---

\* Corresponding author. E-mail: gaonan@tzc.edu.cn

**Table S1.** The fractional atomic coordinates and lattice vectors of NTO at ambient condition.

| <b>lattice vectors</b>    | 9.2413997650  | 0.0000000000 | 0.0000000000 |
|---------------------------|---------------|--------------|--------------|
|                           | 0.0000000000  | 5.5838999748 | 0.0000000000 |
|                           | -1.5979251633 | 0.0000000000 | 8.8859687293 |
| <b>atomic coordinates</b> | <i>x</i>      | <i>y</i>     | <i>z</i>     |
| H <sub>1</sub>            | 0.569580011   | 0.615239960  | 0.196170013  |
| H <sub>2</sub>            | 0.430420002   | 0.384760040  | 0.803830075  |
| H <sub>3</sub>            | 0.430419994   | 0.115239981  | 0.303830024  |
| H <sub>4</sub>            | 0.569580007   | 0.884760040  | 0.696169998  |
| H <sub>5</sub>            | 0.960030000   | 0.013049960  | 0.316989993  |
| H <sub>6</sub>            | 0.039969989   | 0.986950021  | 0.683010029  |
| H <sub>7</sub>            | 0.039969982   | 0.513049979  | 0.183010018  |
| H <sub>8</sub>            | 0.960029956   | 0.486950021  | 0.816990044  |
| C <sub>1</sub>            | 0.797939992   | 0.740069991  | 0.226899999  |
| C <sub>2</sub>            | 0.202059989   | 0.259930009  | 0.773100050  |
| C <sub>3</sub>            | 0.202059986   | 0.240069991  | 0.273100026  |
| C <sub>4</sub>            | 0.797939995   | 0.759930051  | 0.726900023  |
| C <sub>5</sub>            | 0.736450033   | 0.047369959  | 0.356929994  |
| C <sub>6</sub>            | 0.263549982   | 0.952630025  | 0.643070028  |
| C <sub>7</sub>            | 0.263549968   | 0.547369975  | 0.143070017  |
| C <sub>8</sub>            | 0.736450040   | 0.452630025  | 0.856930045  |
| N <sub>1</sub>            | 0.649829972   | 0.738939959  | 0.239230007  |
| N <sub>2</sub>            | 0.350170029   | 0.261059998  | 0.760770015  |
| N <sub>3</sub>            | 0.350170031   | 0.238940002  | 0.260770018  |
| N <sub>4</sub>            | 0.649829980   | 0.761059998  | 0.739230058  |
| N <sub>5</sub>            | 0.611710010   | 0.930219985  | 0.320190034  |
| N <sub>6</sub>            | 0.388289996   | 0.069779993  | 0.679810014  |
| N <sub>7</sub>            | 0.388289968   | 0.430220028  | 0.179809990  |
| N <sub>8</sub>            | 0.611710013   | 0.569779972  | 0.820190059  |

---

|                 |             |             |             |
|-----------------|-------------|-------------|-------------|
| N <sub>9</sub>  | 0.851850010 | 0.946269976 | 0.304790007 |
| N <sub>10</sub> | 0.148150025 | 0.053730013 | 0.695209988 |
| N <sub>11</sub> | 0.148150019 | 0.446269976 | 0.195210017 |
| N <sub>12</sub> | 0.851850022 | 0.553730024 | 0.804790085 |
| N <sub>13</sub> | 0.748460038 | 0.261870034 | 0.448280021 |
| N <sub>14</sub> | 0.251540020 | 0.738129988 | 0.551720027 |
| N <sub>15</sub> | 0.251540016 | 0.761870055 | 0.051719996 |
| N <sub>16</sub> | 0.748460040 | 0.238129966 | 0.948280046 |
| O <sub>1</sub>  | 0.862450034 | 0.589519967 | 0.162850014 |
| O <sub>2</sub>  | 0.137550011 | 0.410480033 | 0.837150034 |
| O <sub>3</sub>  | 0.137549997 | 0.089519977 | 0.337149983 |
| O <sub>4</sub>  | 0.862449985 | 0.910479991 | 0.662850039 |
| O <sub>5</sub>  | 0.870559956 | 0.359689946 | 0.473120019 |
| O <sub>6</sub>  | 0.129440012 | 0.640310054 | 0.526880029 |
| O <sub>7</sub>  | 0.129440020 | 0.859689946 | 0.026879997 |
| O <sub>8</sub>  | 0.870560001 | 0.140310054 | 0.973119990 |
| O <sub>9</sub>  | 0.636480025 | 0.329949983 | 0.494569986 |
| O <sub>10</sub> | 0.363520023 | 0.670050017 | 0.505430009 |
| O <sub>11</sub> | 0.363520025 | 0.829949941 | 0.005430013 |
| O <sub>12</sub> | 0.636479995 | 0.170050027 | 0.994570118 |

---

**Table S2.** Characteristics of vibrational modes in NTO crystal at ambient pressure. Abbreviation: asym: asymmetric, st: stretching, bend: bending, sci: scissoring, def: deformation, wag: wagging, tw: twisting, tor: torsion, rock: rocking.

| Mode       | Wavenumber/cm <sup>-1</sup> |                |                |                |                | Assignment                                    |
|------------|-----------------------------|----------------|----------------|----------------|----------------|-----------------------------------------------|
|            | Expt. <sup>S1</sup>         | A <sub>g</sub> | B <sub>g</sub> | A <sub>u</sub> | B <sub>u</sub> |                                               |
| $\nu_1$    |                             | 3140           | 3160           | 3139           | 3175           | N-H st.                                       |
| $\nu_2$    |                             | 2841           | 2885           | 2844           | 2912           | N-H st.                                       |
| $\nu_3$    |                             | 1649           | 1699           | 1663           | 1672           | C=O st. + N-H bend.                           |
| $\nu_4$    |                             | 1531           | 1535           | 1533           | 1532           | N-H bend. + C-N st.                           |
| $\nu_5$    |                             | 1462           | 1464           | 1453           | 1463           | NO <sub>2</sub> asym. st + N-H bend. in plane |
| $\nu_6$    | 1395                        | 1451           | 1452           | 1440           | 1442           | N-H bend. in plane                            |
| $\nu_7$    | 1323                        | 1399           | 1403           | 1396           | 1405           | N-H bend. in plane                            |
| $\nu_8$    | 1271                        | 1292           | 1303           | 1299           | 1298           | N-H bend. in plane                            |
| $\nu_9$    | 1238                        | 1265           | 1267           | 1265           | 1265           | C-N st. + N-H bend.                           |
| $\nu_{10}$ |                             | 1208           | 1217           | 1210           | 1212           | C-N st. + N-H bend.                           |
| $\nu_{11}$ | 1090                        | 1093           | 1089           | 1099           | 1091           | C-N st. + N-H bend.                           |
| $\nu_{12}$ | 1000                        | 984            | 1000           | 985            | 1000           | C-N st. + N-H bend.                           |
| $\nu_{13}$ |                             | 976            | 971            | 975            | 978            | N-H bend. out of plane                        |
| $\nu_{14}$ | 881                         | 894            | 914            | 875            | 887            | N-H bend. out of plane                        |
| $\nu_{15}$ | 789                         | 805            | 810            | 808            | 808            | NO <sub>2</sub> sci. + Ring def.              |
| $\nu_{16}$ | 754                         | 741            | 759            | 739            | 754            | N-H wag. out of plane + C-N st.               |
| $\nu_{17}$ | 724                         | 733            | 739            | 736            | 736            | N-H wag. out of plane + C-N st.               |
| $\nu_{18}$ | 710                         | 723            | 733            | 724            | 733            | N-H wag. out of plane                         |
| $\nu_{19}$ | 662                         | 684            | 691            | 686            | 686            | N-H wag. out of plane                         |
| $\nu_{20}$ |                             | 602            | 593            | 606            | 589            | Ring def. + N-H bend. in plane                |
| $\nu_{21}$ | 571                         | 574            | 574            | 574            | 575            | Ring rock. + N-H bend. in plane               |
| $\nu_{22}$ | 468                         | 454            | 473            | 454            | 471            | Ring def.                                     |
| $\nu_{23}$ | 458                         | 404            | 405            | 405            | 403            | Ring def. + NO <sub>2</sub> sci.              |
| $\nu_{24}$ | 339                         | 335            | 341            | 343            | 335            | Ring def. + C=O bend. out of plane            |
| $\nu_{25}$ | 210                         | 220            | 238            | 213            | 246            | Ring def. + C=O bend. out of plane            |
| $\nu_{26}$ | 186                         | 186            | 161            | 176            | 184            | Ring def. + C=O bend. out of plane            |
| $\nu_{27}$ | 165                         | 165            | 133            | 160            | 141            | Ring def. + NO <sub>2</sub> tw.               |
| $\nu_{28}$ | 137                         | 151            | 116            | 144            | 125            | Ring def. + NO <sub>2</sub> tw.               |
| $\nu_{29}$ |                             | 121            | 100            | 116            | 117            | Ring def. + NO <sub>2</sub> tw.               |
| $\nu_{30}$ | 77                          | 96             | 82             | 96             | 88             | Ring def. + NO <sub>2</sub> tor.              |
| $\nu_{31}$ |                             | 77             | 65             | 86             | 81             | Ring def. + NO <sub>2</sub> tor.              |
| $\nu_{32}$ |                             | 29             | 48             | 31             | 38             | Ring def. + NO <sub>2</sub> tor.              |
| $\nu_{33}$ |                             | 15             | 34             | 28             | 30             | Ring def. + NO <sub>2</sub> tor.              |

**Table S3.** The frequencies of low-wavenumber vibrational modes (below 100 cm<sup>-1</sup>) at ambient and pressure conditions.

| Pressure/GPa | Wavenumber/cm <sup>-1</sup> |            |            |            |            |            |            |            |
|--------------|-----------------------------|------------|------------|------------|------------|------------|------------|------------|
|              | Raman modes                 |            |            |            | IR modes   |            |            |            |
|              | $\nu_{30}$                  | $\nu_{31}$ | $\nu_{32}$ | $\nu_{33}$ | $\nu_{30}$ | $\nu_{31}$ | $\nu_{32}$ | $\nu_{33}$ |
| 0            | 96                          | 77         | 29         | 19         | 96         | 86         | 31         | 29         |
| 1            | 122                         | 99         | 83         | 32         | 149        | 104        | 43         | 37         |
| 2            | 110                         | 83         | 48         | 35         | 140        | 69         | 56         | 38         |
| 3            | 160                         | 106        | 87         | 38         | 152        | 140        | 70         | 51         |
| 4            | 157                         | 127        | 110        | 42         | 145        | 136        | 92         | 66         |
| 5            | 151                         | 121        | 102        | 43         | 131        | 123        | 84         | 72         |
| 6            | 175                         | 150        | 89         | 49         | 159        | 148        | 86         | 78         |
| 7            | 175                         | 162        | 92         | 51         | 161        | 150        | 95         | 83         |
| 8            | 182                         | 148        | 76         | 59         | 161        | 145        | 91         | 86         |
| 9            | 182                         | 177        | 106        | 67         | 175        | 147        | 113        | 99         |
| 10           | 166                         | 161        | 104        | 79         | 171        | 147        | 65         | 81         |
| 11           | 172                         | 160        | 108        | 95         | -          | -          | -          | -          |
| 12           | 180                         | 162        | 115        | 97         | -          | -          | -          | -          |
| 13           | 187                         | 166        | 120        | 97         | -          | -          | -          | -          |
| 14           | 195                         | 172        | 126        | 97         | -          | -          | -          | -          |
| 15           | 197                         | 177        | 132        | 99         | -          | -          | -          | -          |

**Table S4.** The charge amount ( $e$ ) on atoms at hydrostatic compression.

| Pressure<br>/ GPa | C <sub>1</sub> | C <sub>2</sub> | N <sub>1</sub> | N <sub>2</sub> | N <sub>3</sub> | N <sub>4</sub> | O <sub>1</sub> | O <sub>2</sub> | O <sub>3</sub> |
|-------------------|----------------|----------------|----------------|----------------|----------------|----------------|----------------|----------------|----------------|
| 0                 | 0.67           | 0.81           | 4.55           | 6.25           | 6.69           | 8.13           | 6.45           | 6.46           | 8.00           |
| 2                 | 0.66           | 0.81           | 4.56           | 6.24           | 6.69           | 8.12           | 6.46           | 6.47           | 7.99           |
| 4                 | 0.65           | 0.82           | 4.57           | 6.23           | 6.70           | 8.09           | 6.47           | 6.47           | 7.98           |
| 6                 | 0.63           | 0.83           | 4.59           | 6.21           | 6.71           | 8.07           | 6.50           | 6.50           | 7.96           |
| 8                 | 0.63           | 0.84           | 4.59           | 6.20           | 6.72           | 8.06           | 6.51           | 6.50           | 7.95           |
| 10                | 0.61           | 0.84           | 4.60           | 6.19           | 6.72           | 8.05           | 6.53           | 6.51           | 7.95           |

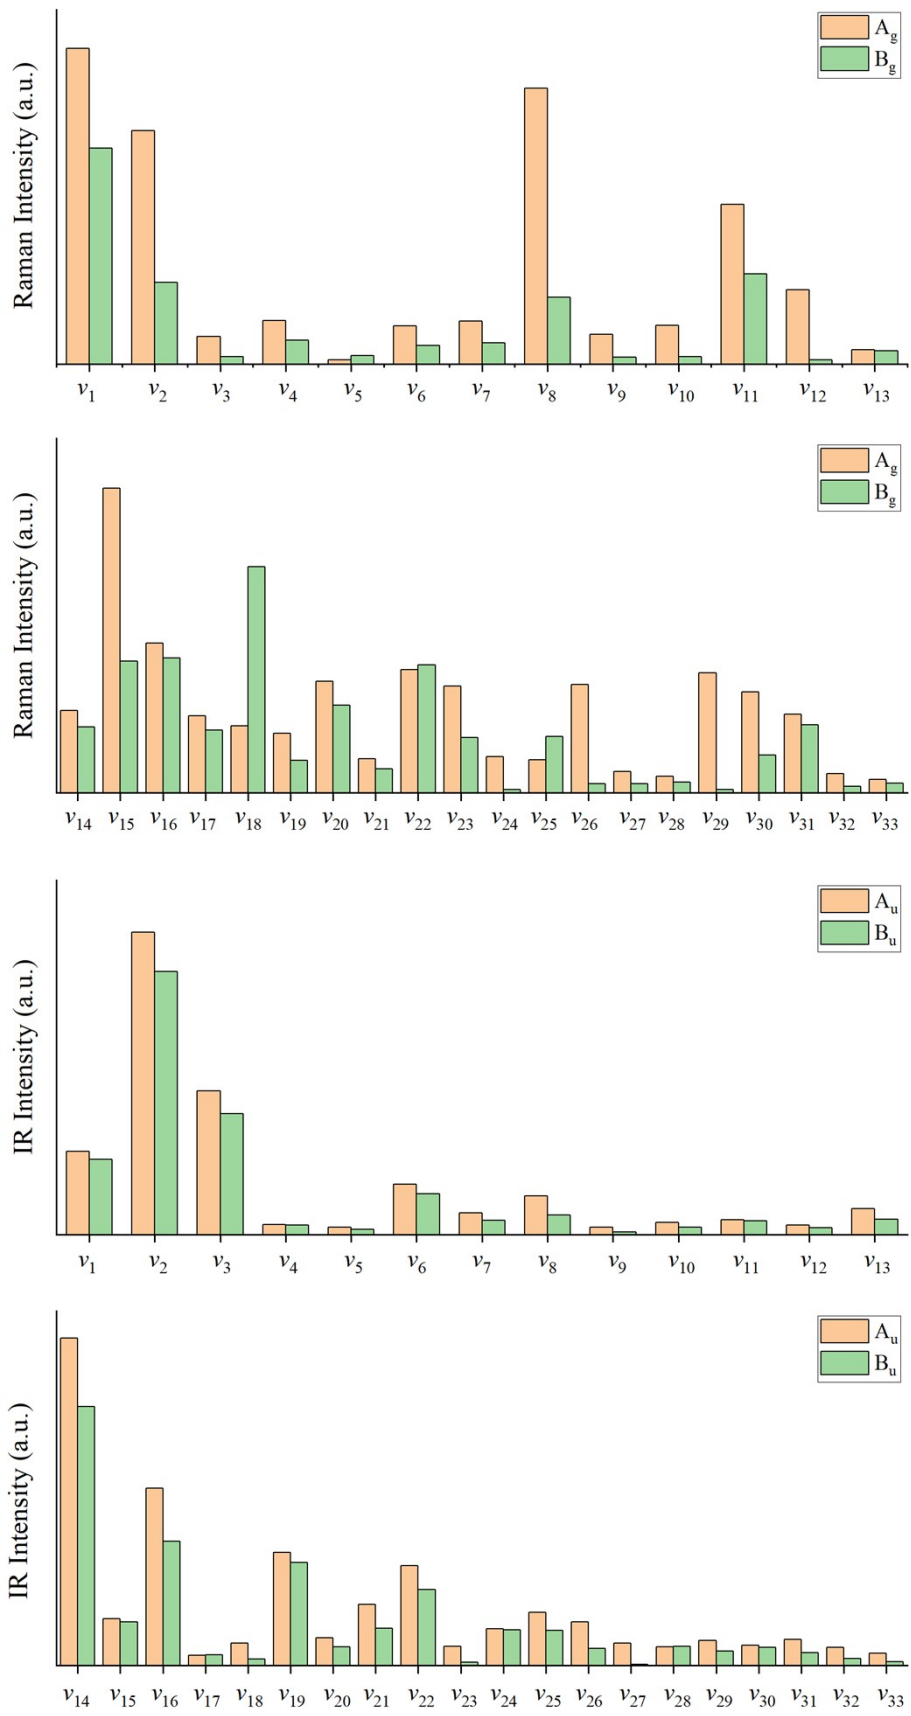

**Fig. S1** The intensity of Raman and infrared modes with different symmetries ( $A_g$ ,  $B_g$ ,  $A_u$ ,  $B_u$ ).

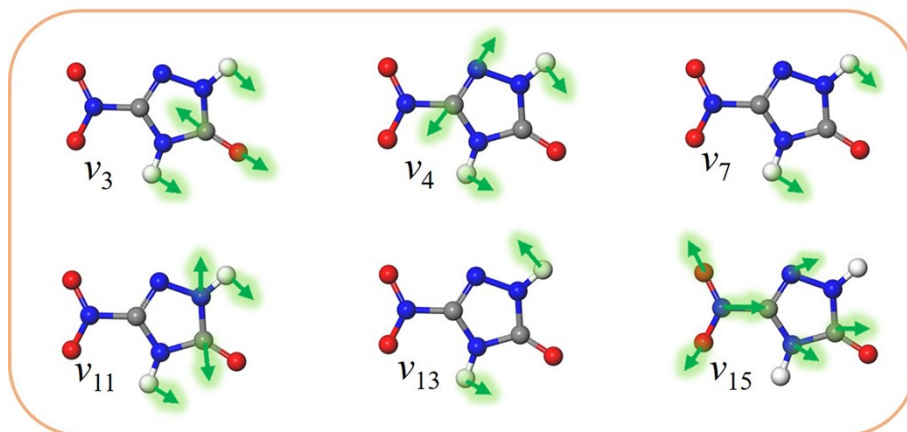

**Fig. S2** The visualization of N-H bending modes  $v_{7,13}$ ; and coupled with C=O stretching  $v_3$ , C-N stretching  $v_{4,11}$  or O-N-O scissoring modes  $v_{15}$ .



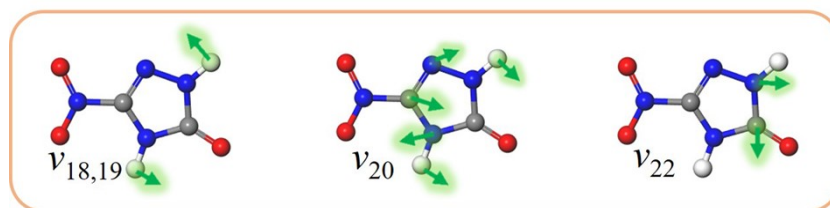

**Fig. S3** The visualization of N-H wagging modes  $\nu_{18,19}$ ; and coupled with ring deformation  $\nu_{20,22}$ .

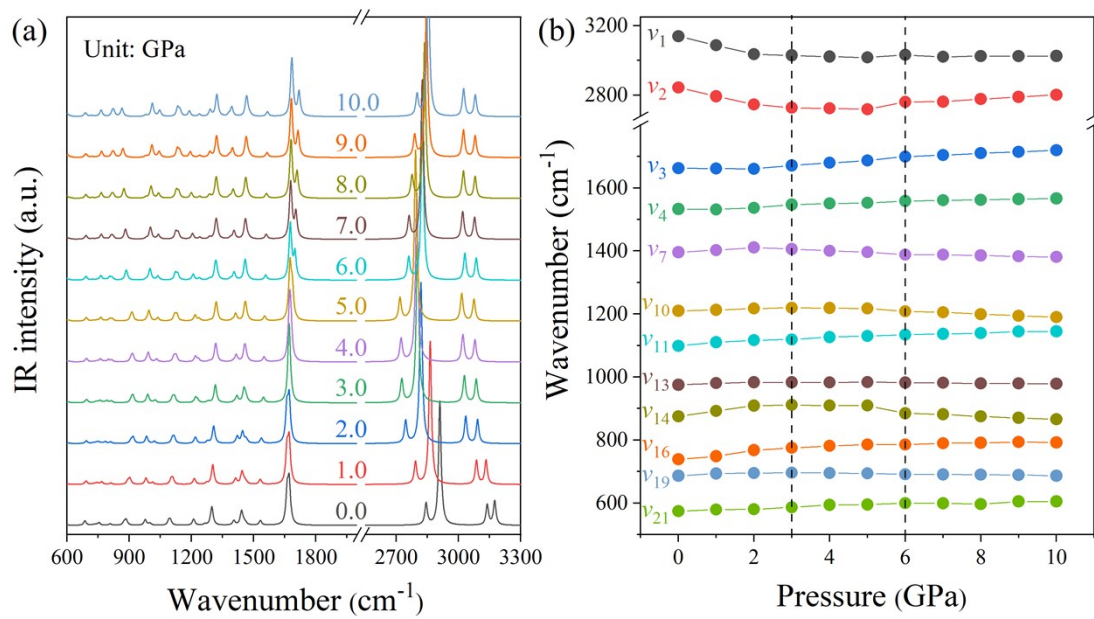

**Fig. S4** (a) The variations of infrared spectra under hydrostatic pressure. (b) The wavenumber shifts of selected infrared vibrational modes under pressure.

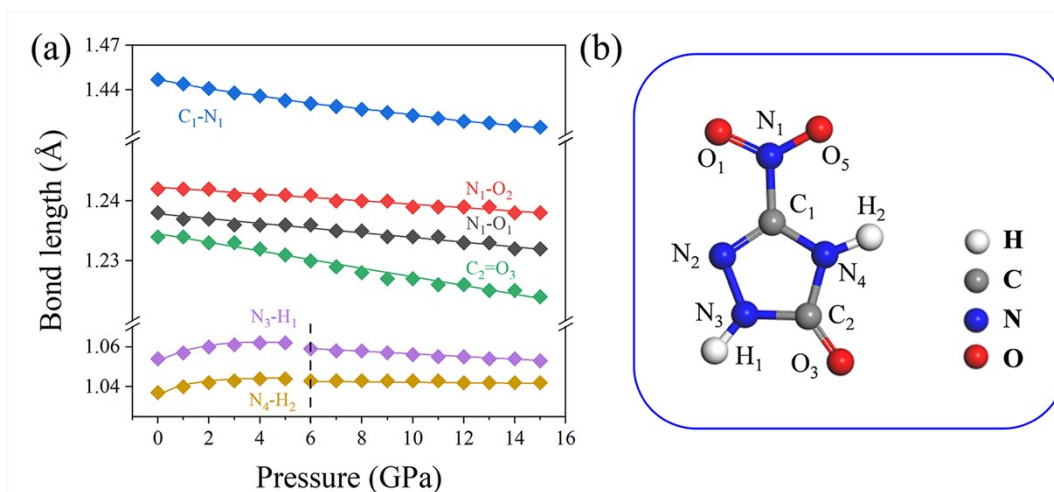

**Fig. S5** (a) The evolution of molecular bond lengths under hydrostatic compression; (b) The atom serial numbers of NTO molecule are labeled.

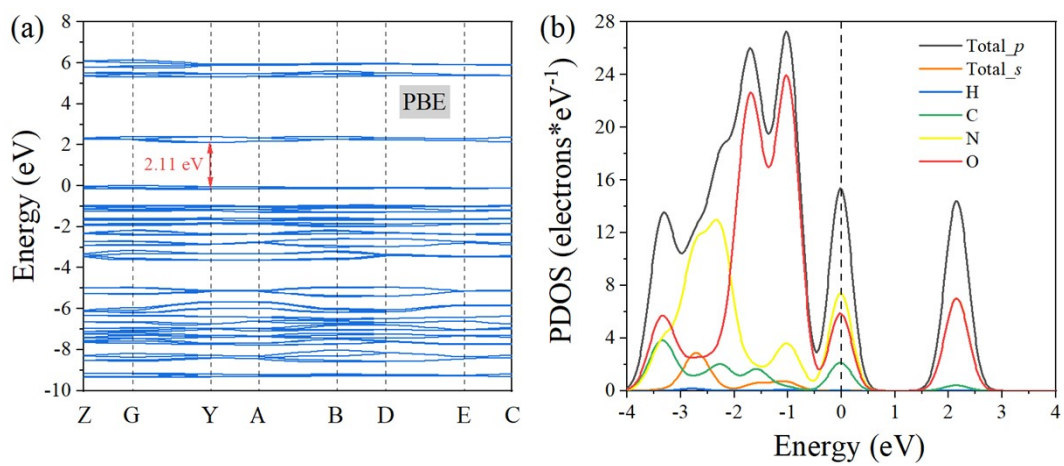

**Fig. S6** The Energy band structure (a) and partial density of states (b) from PBE functional.

## References

- [S1] J. A. Ciezak and S. F. Trevino, *J. Mol. Struct.*, 2005, **732**, 211-218.
